# Supplementary material
Source: Copernicus journal article supplement (doi:10.5194/egusphere-2026-2309)
Supplement: Supplementary file 1 [file egusphere-2026-2309-supplement.pdf]

1 *Supplement of*

2

3 **Constraints on NO<sub>x</sub> emission in Thailand using GEMS satellite data**

4

5

6 Thongsame et al.

7

8 *Correspondence to:* Worapop Thongsame (t.worapop@gmail.com)

9

10

11

12

13

14

15

16

17

18

19

20

21

22

23

24

25

26

27

28

29

30

31

32

33

34

35

36

37

38

39

40

41

42

43

44

## 45 **S1 The impact of the hyperparameter on IFDMB**

46

47 In this section, we evaluate the impact of  $C_1$  and  $C_2$  parameters on the IFDMB performance.  
48 IFDMB with fixed diurnal update is applied to four different sets of  $[C_1, C_2]$  parameters, and we  
49 evaluate IFDMB solution as a function of iteration for each. The four  $[C_1, C_2]$  parameters are  
50  $[2 \times 10^{15}, 1]$ ,  $[2 \times 10^{15}, 10]$ ,  $[1 \times 10^{14}, 1]$ , and  $[1 \times 10^{14}, 10]$ . We find that iteration five is the optimal  
51 iteration for  $[2 \times 10^{15}, 1]$  and  $[2 \times 10^{15}, 10]$ , and iteration two is optimal for  $[1 \times 10^{14}, 1]$  and  $[1 \times 10^{14}, 10]$ .  
52 All four parameters produce similar spatial patterns in model performance (Table S1). The  
53 IFDMB with fixed diurnal update significantly reduces both NMB and NRMSE relative to GEMS  
54 observations across Thailand, particularly in the Bangkok Metropolitan Region.

55

56 Increasing  $C_1$  from  $1 \times 10^{14}$  to  $2 \times 10^{15}$  molecules  $\text{cm}^{-2}$  suppresses the influence of satellite  
57 constraints, resulting in higher NMB and NRMSE values for the  $[2 \times 10^{15}, 1]$  and  $[2 \times 10^{15}, 10]$   
58 cases, especially in Central and East Thailand (Figs. S1 and S2). This is attributed to smaller  
59 emission updates under high  $C_1$ . Even though the  $\sigma_o$  in these regions is low (on the order of  $0.5$   
60  $- 0.2 \times 10^{13}$  molecules  $\text{cm}^{-2}$ ), the corresponding  $\text{NO}_2$  VCDs are also relatively low, which leads to  
61 a small  $J_{\text{prediction}}$  compared to the  $J_{\text{parameter}}$ . This causes the solution to remain close to the  
62 prior emissions. However, a larger  $C_1$  value helps prevent overfitting in rural North Thailand,  
63 where  $\sigma_o$  is much higher.

64

65 Increasing  $C_2$  from 1 to 10  $\text{mol km}^{-2} \text{hr}^{-1}$  has minimal impact in the  $[1 \times 10^{14}, 1]$  and  $[1 \times 10^{14}, 10]$   
66 cases. While the percentage change in emissions is relatively larger in  $[1 \times 10^{14}, 10]$ , the  
67 improvements in NMB and NRMSE are comparable:  $[1 \times 10^{14}, 1]$  reduces NMB by 66% and  
68 NRMSE by 62%, whereas  $[1 \times 10^{14}, 10]$  achieves 47% and 48% reductions, respectively (Table  
69 S1). This is because the larger emission adjustments occur in low-emission areas, thus  
70 contributing little to the overall  $\text{NO}_2$  VCD improvements. In contrast, the effect of increasing  $C_2$  is  
71 more pronounced in the  $[2 \times 10^{15}, 1]$  and  $[2 \times 10^{15}, 10]$  cases. A higher  $C_2$  value (10  $\text{mol km}^{-2} \text{hr}^{-1}$ )  
72 allows emissions in Central and East Thailand to be more effectively constrained by GEMS data  
73 compared to  $C_2 = 1$  (Figs. S1 and S2). Consequently, NMB and NRMSE improve significantly in  
74  $[2 \times 10^{15}, 1]$  with  $\sim 30\%$  reduction. The  $[2 \times 10^{15}, 10]$  yields reductions of approximately 47% in both  
75 metrics.

76

77 The parameter  $C_1$  notably influences the relative errors between the Bangkok Metropolitan  
78 Region and North Thailand. A low  $C_1$  value ( $1 \times 10^{14}$  molecules  $\text{cm}^{-2}$ ) permits large adjustments  
79 even in high error areas (Fig. S3) in GEMS like North Thailand. This greatly decreases NMB  
80 and RMSE in the Bangkok Metropolitan Region, but also excessively increases bias and error in  
81 North Thailand (Figs. S1 and S2). In contrast, a high  $C_1$  ( $2 \times 10^{15}$  molecules  $\text{cm}^{-2}$ ) constrains  
82 adjustments in the North, preventing over-correction and lowering bias and error in that region.  
83 However, it also limits the improvement in the Bangkok Metropolitan Region.

84

85 The second parameter,  $C_2$ , primarily affects adjustments for smaller emission sources (such as  
86 rural areas). Using a smaller  $C_2$  limits the changes in rural emissions (Fig. S3), keeping those  
87 values closer to the prior and yielding lower bias and error against TROPOMI. In contrast, a  
88 larger  $C_2$  allows greater adjustments for low-emission areas, which led to higher bias and error

89 in rural North due to overfitting to the GEMS data. Overall, the adjustable parameters  $[C_1, C_2]$  in  
 90 IFDDB offer flexibility to manage the mismatch between GEMS and TROPOMI in the North by  
 91 moderating the influence of emission updates in high-error regions and balancing between prior  
 92 and posterior estimates.

93

94 **Table S1: Monthly statistical evaluation between WRF-Chem and GEMS NO<sub>2</sub> VCD of**  
 95 **IFDDB for each  $[C_1, C_2]$  parameters:  $[1 \times 10^{14}, 1]$ ,  $[2 \times 10^{15}, 1]$ ,  $[1 \times 10^{14}, 10]$ , and  $[2 \times 10^{15}, 10]$ .**

96

|          | $[1 \times 10^{14}, 1]$ |        |          | $[2 \times 10^{15}, 1]$ |        |          | $[1 \times 10^{14}, 10]$ |        |          | $[2 \times 10^{15}, 10]$ |        |          |
|----------|-------------------------|--------|----------|-------------------------|--------|----------|--------------------------|--------|----------|--------------------------|--------|----------|
|          | MB                      | RMSE   | <i>R</i> | MB                      | RMSE   | <i>R</i> | MB                       | RMSE   | <i>R</i> | MB                       | RMSE   | <i>R</i> |
| All hour | 28.78                   | 58.01  | 0.83     | 58.95                   | 106.51 | 0.67     | 31.90                    | 56.25  | 0.84     | 44.12                    | 78.38  | 0.80     |
| 8 AM     | 182.35                  | 238.83 | 0.74     | 239.49                  | 320.79 | 0.56     | 184.21                   | 235.57 | 0.75     | 207.88                   | 266.08 | 0.72     |
| 9 AM     | 137.07                  | 186.46 | 0.81     | 191.50                  | 268.58 | 0.69     | 142.48                   | 187.51 | 0.80     | 163.54                   | 215.74 | 0.81     |
| 10 AM    | 68.16                   | 116.39 | 0.80     | 109.21                  | 179.89 | 0.69     | 74.24                    | 117.91 | 0.78     | 89.83                    | 142.27 | 0.79     |
| 11 AM    | 22.23                   | 67.94  | 0.77     | 51.59                   | 112.94 | 0.63     | 26.71                    | 67.61  | 0.77     | 38.56                    | 87.41  | 0.75     |
| 12 PM    | -3.62                   | 50.73  | 0.72     | 19.85                   | 84.19  | 0.55     | -0.24                    | 48.86  | 0.73     | 9.10                     | 66.10  | 0.69     |
| 2 PM     | -6.81                   | 56.53  | 0.65     | 16.52                   | 90.37  | 0.48     | -4.75                    | 53.50  | 0.68     | 5.78                     | 73.10  | 0.61     |
| 3 PM     | 2.28                    | 59.95  | 0.66     | 27.87                   | 98.65  | 0.51     | 5.07                     | 58.27  | 0.69     | 15.69                    | 78.92  | 0.63     |

97

98

99

100

101

102

103

104

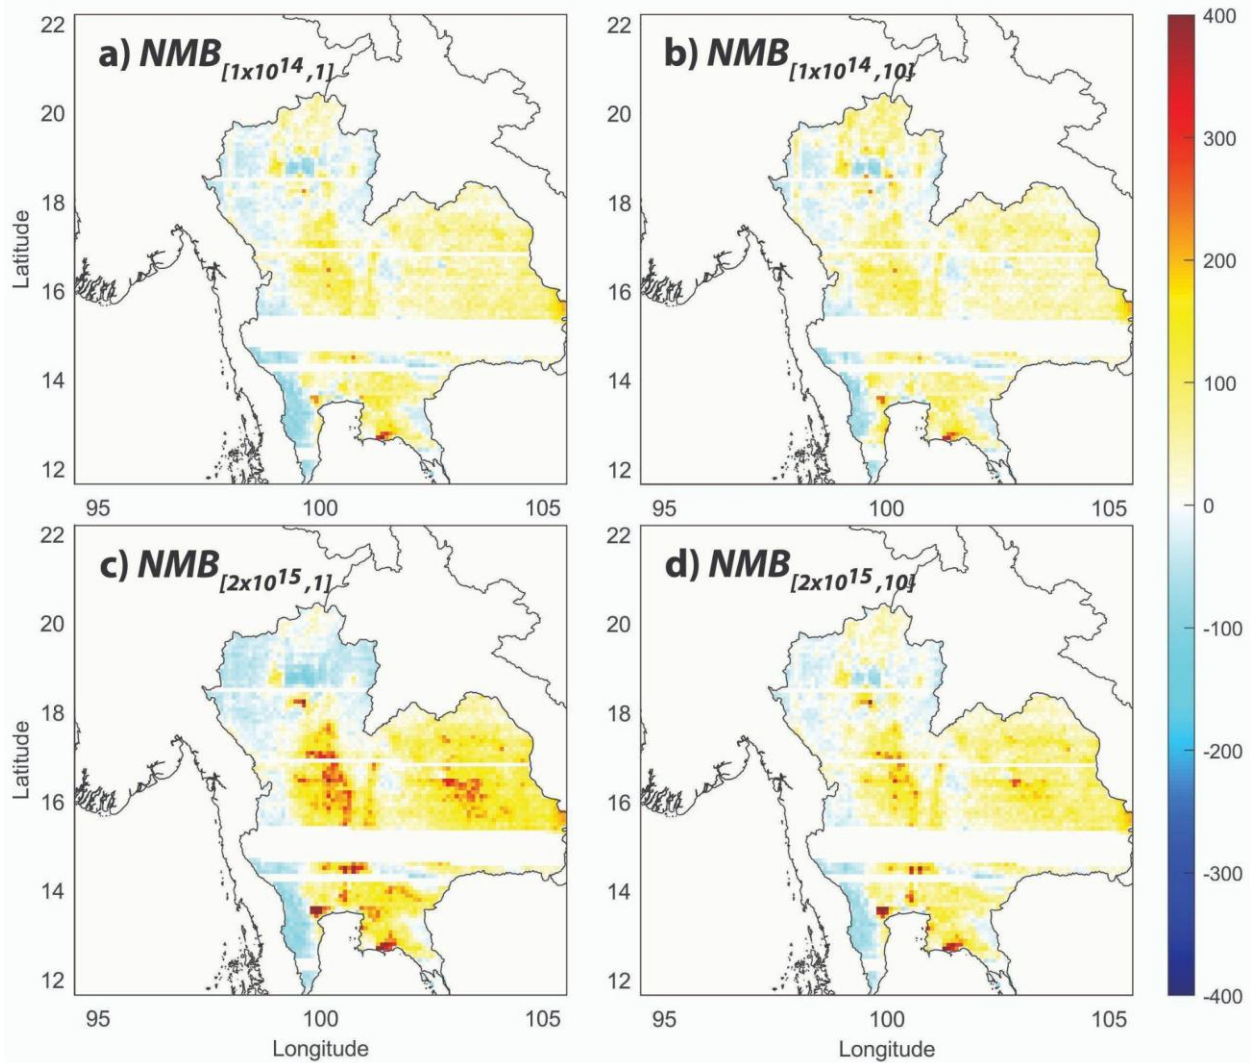

105  
 106  
 107  
 108  
 109

**Figure S1: Normalized Mean Bias (NMB) of hourly NO<sub>2</sub> VCD between WRF-Chem and GEMS of IFDMB for September 2023 using  $[C_1, C_2]$ : (a)  $[1 \times 10^{14}, 1]$ , (b)  $[1 \times 10^{14}, 10]$ , (c)  $[2 \times 10^{15}, 1]$ , and (d)  $[2 \times 10^{15}, 10]$ .**

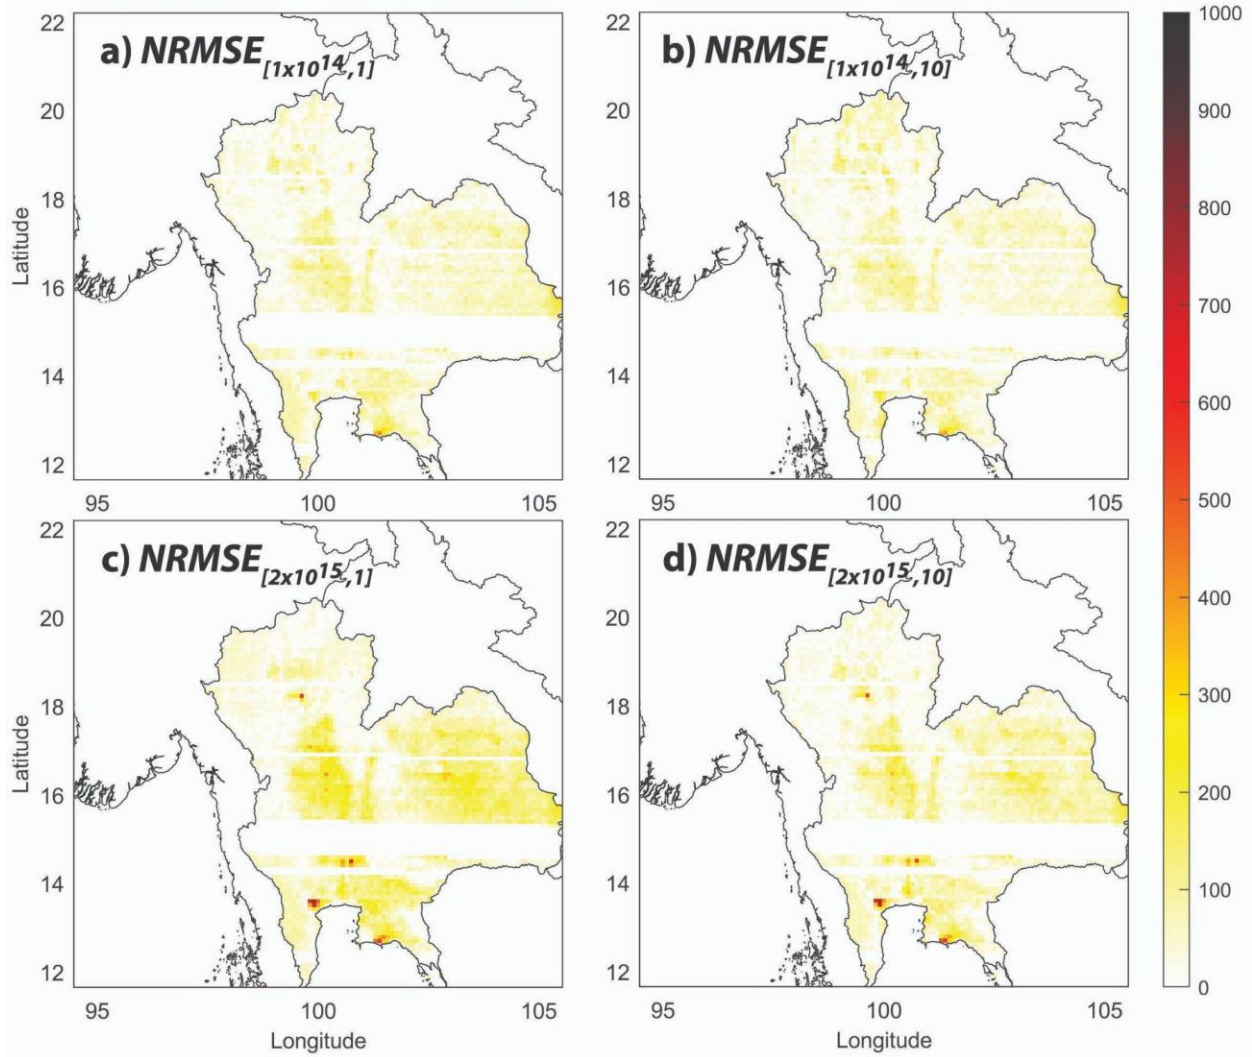

110  
 111  
 112  
 113  
 114  
 115  
 116  
 117  
 118  
 119  
 120  
 121  
 122  
 123

**Figure S2: Normalized Root Mean Square (NRMSE) of hourly NO<sub>2</sub> VCD between WRF-Chem and GEMS of IFDMB for September 2023 using  $[C_1, C_2]$ : (a)  $[1 \times 10^{14}, 1]$ , (b)  $[1 \times 10^{14}, 10]$ , (c)  $[2 \times 10^{15}, 1]$ , and (d)  $[2 \times 10^{15}, 10]$ .**

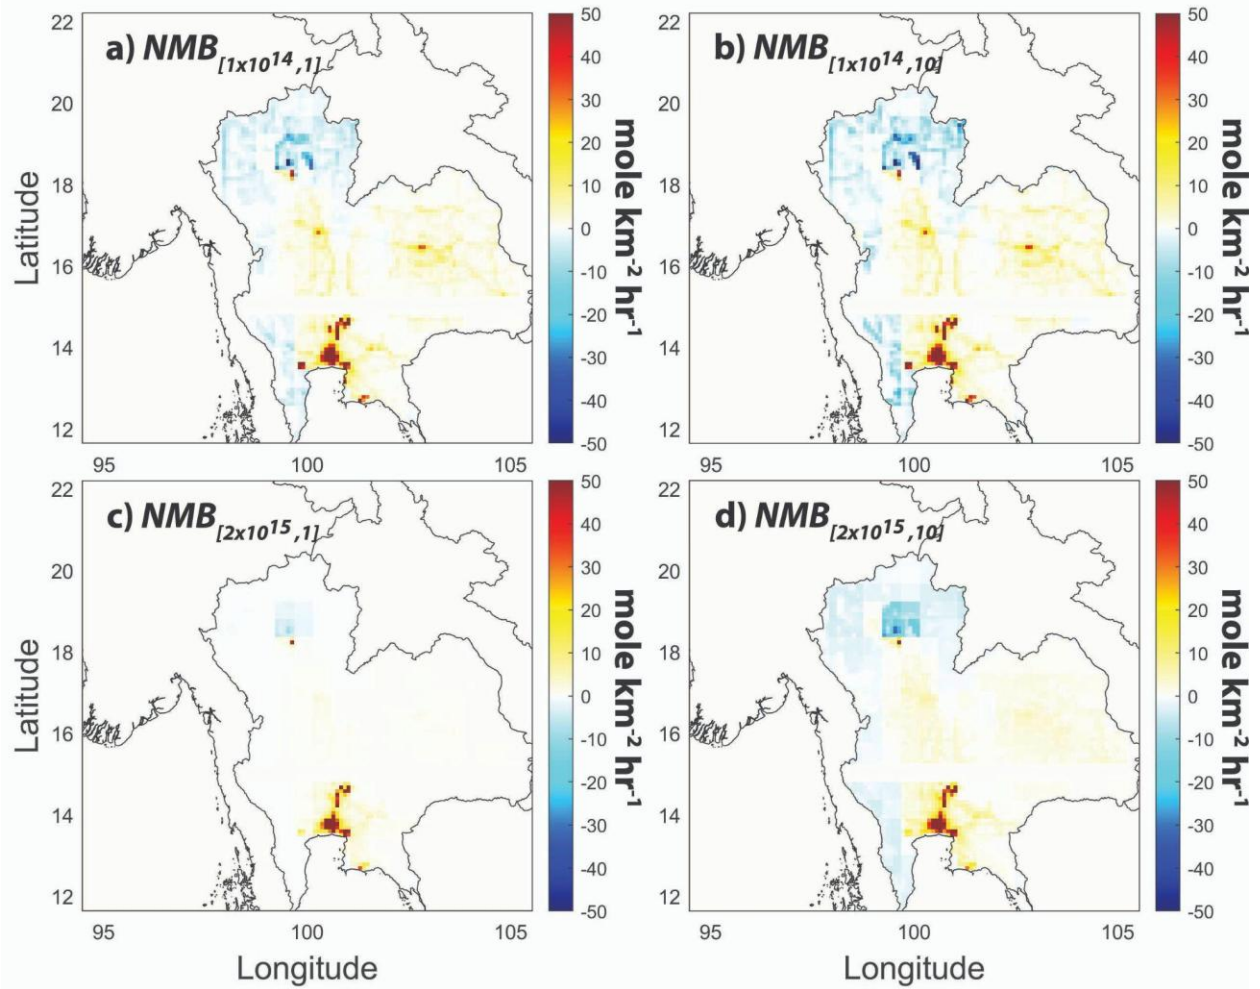

124  
 125  
 126  
 127  
 128  
 129  
 130  
 131  
 132  
 133  
 134  
 135  
 136  
 137  
 138  
 139  
 140  
 141  
 142

**Figure S3: The emission changes from prior for IFDMB with different  $[C_1, C_2]$  values: (a) changes from  $[1 \times 10^{14}, 1]$ , (b) changes from  $[1 \times 10^{14}, 10]$ , (c) changes from  $[2 \times 10^{15}, 1]$ , and (d) changes from  $[2 \times 10^{15}, 10]$ .**

## 143 **S2 The comparison between GEMS DVCF and GEMS DOAS**

144

145 The retrieval algorithm impacts the NO<sub>2</sub> VCDs from the GEMS satellite. Yang et al. (2023) use  
146 the Direct Vertical Column Fitting (DVCF) algorithm, whereas GEMS version 3 relies on the  
147 DOAS algorithm. The two products also differ in their prior models. The DVCF algorithm (Huang  
148 et al., 2022; Yang et al., 2014) finds the modeled radiance spectra ( $I_{TOA}$ ) that match the satellite  
149 measured spectra ( $I_m$ ) by minimizing the cost function as shown in Eq (S1).

150

$$151 \ln I_m(\lambda) - \ln I_{TOA}(\lambda) = V \int_0^\infty \frac{\partial \ln I_{TOA}(\lambda)}{\partial \tau_z} S_z \sigma(\lambda, T_z) dz - \sum_{i=1}^m \xi_i \sigma_i(\lambda, T_i) +$$
$$152 \sum_{k=0}^{n-1} \frac{\partial \ln I_{TOA}(\lambda)}{\partial R} \Delta R_k (\lambda - \lambda_0)^k + \varepsilon \quad (S1)$$

153

154 where  $\lambda$  is the wavelength and  $V$  is the NO<sub>2</sub> vertical column.  $S_z$  is the shape factor derived from  
155 the normalized vertical profile at the altitude ( $z$ ). A more detailed explanation of the algorithm is  
156 in Yang et al. (2014).

157

158 The prior model used in GEMS DVCF is GEOS-CF using the HTAP inventory, while that in  
159 GEMS DOAS is GEOS-Chem using the ASIA-AQv3 inventory. These differences contribute to  
160 variations in the slant columns, vertical columns, and averaging kernels between GEMS DVCF  
161 and GEMS DOAS.

162

163 Because the averaging kernels differ between GEMS DVCF and GEMS DOAS, direct  
164 comparison is not feasible; therefore, we assess the relative NO<sub>2</sub> distributions instead. GEMS  
165 DVCF has relatively higher NO<sub>2</sub> over the Bangkok Metropolitan Region compared to North  
166 Thailand, while GEMS DOAS has higher NO<sub>2</sub> levels in the North (Fig. S4). Notably, GEMS  
167 DOAS has a large NO<sub>2</sub> signal over Lampang due to the high NO<sub>x</sub> emissions in ASIA-AQv3. This  
168 high NO<sub>2</sub> is absent in both GEMS DOAS and TROPOMI. The uncertainties in ASIA-AQv3 lead  
169 to high retrieval error in GEMS DOAS in Lampang. Furthermore, both GEMS ACX and GEMS  
170 v3 exhibit artificial striping, implying that the stripes originate from the instrument itself rather  
171 than the retrieval algorithm.

172

173 We also compare the magnitude of NO<sub>2</sub> columns between the two retrievals using the baseline  
174 WRF-Chem simulation as a reference. When compared with GEMS DOAS, the baseline  
175 simulation generally overestimates NO<sub>2</sub> VCDs across Thailand, with an NMB of 84 and an  
176 NRMSE of 152 (Fig. S5). The model notably overestimates NO<sub>2</sub> in the Bangkok Metropolitan  
177 Region but underestimates it in North and West Thailand. For GEMS DVCF, we normalize the  
178 bias and error using the retrieval error from GEMS DOAS, as there is no error provided in  
179 GEMS DVCF. The baseline simulation overestimates NO<sub>2</sub> VCDs across most of the domain,  
180 with an NMB of 198 and NRMSE of 216, except in the western Bangkok Metropolitan Region  
181 (Fig. S5). This suggests that the CAMS-GLOB-ANT inventory overestimates NO<sub>x</sub> emissions in  
182 Thailand when compared with GEMS DOAS. In contrast, CAMS-GLOB-ANT tends to  
183 underestimate NO<sub>x</sub> emissions in North Thailand relative to GEMS DOAS. Although GEMS  
184 DVCF shows good agreement with CAMS-GLOB-ANT over major NO<sub>x</sub> sources such as  
185 Bangkok, Rayong, and the Mae Moh power plant, it yields much lower NO<sub>2</sub> VCDs in small cities

186 and background regions compared to these urban and industrial areas. Additionally, GEMS  
 187 DVCF shows a broader spatial spread of NO<sub>2</sub> over the Bangkok Metropolitan Region than  
 188 TROPOMI. Considering these characteristics, we adopt the GEMS DOAS product for this study.  
 189

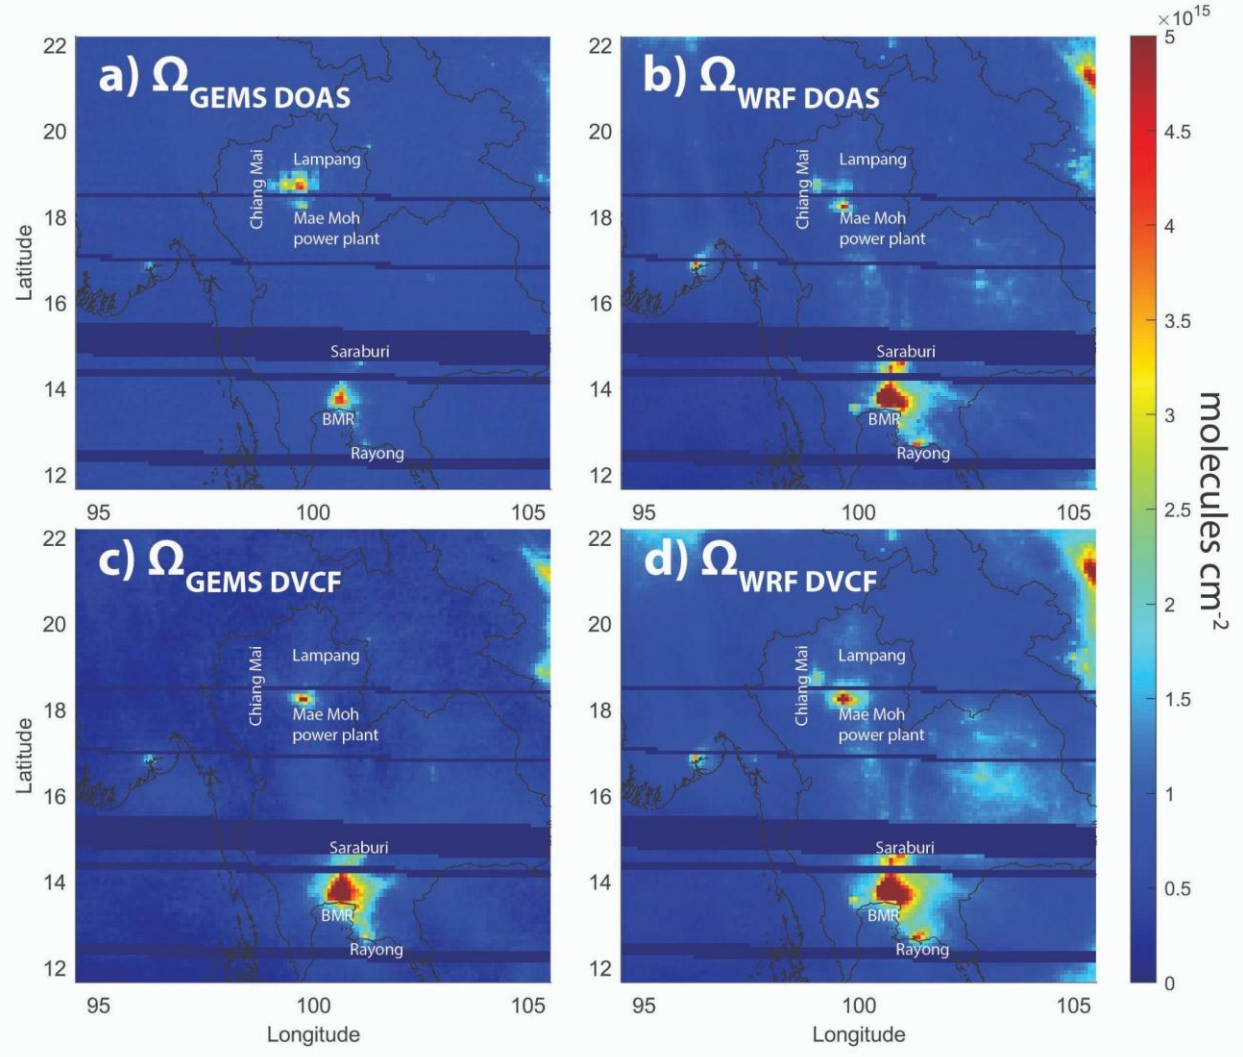

190  
 191 **Figure S4: Monthly average tropospheric NO<sub>2</sub> VCD in September 2023 from GEMS DOAS**  
 192 **(a) and GEMS DVCF (c), the baseline simulation applying the averaging kernel from**  
 193 **GEMS DOAS (b) and GEMS DVCF (d). High NO<sub>2</sub> VCDs are observed over urban areas**  
 194 **such as Chiang Mai, Lampang, and the Bangkok Metropolitan Region (BMR), as well as**  
 195 **over the Mae Moh power plant and industrial zones in Saraburi and Rayong.**

196  
 197  
 198  
 199

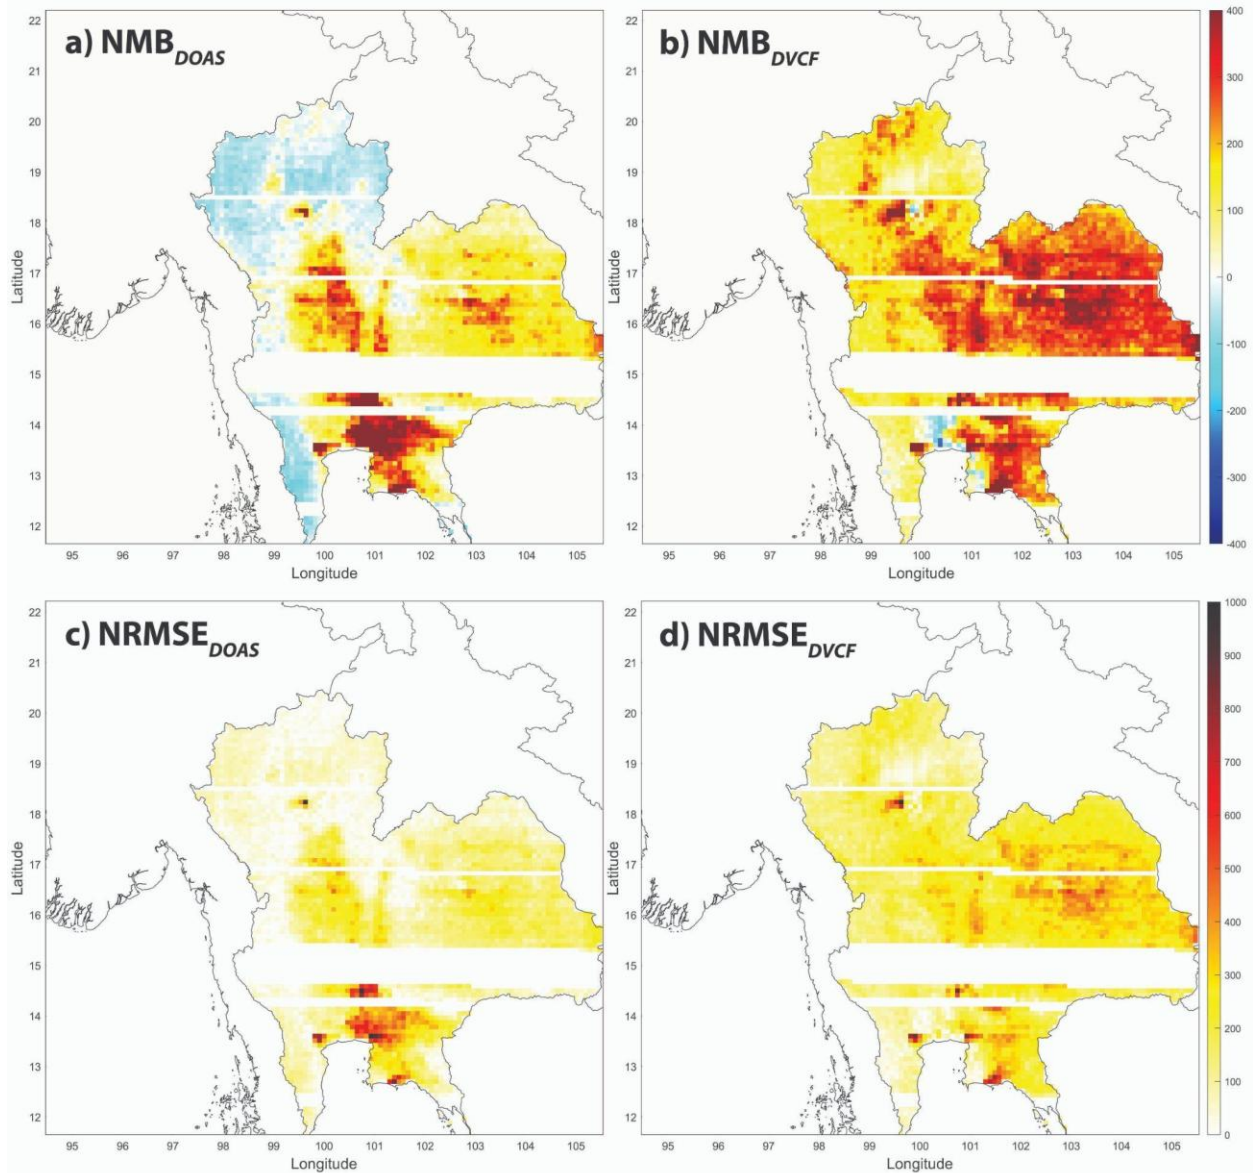

200  
 201 **Figure S5: Normalized Mean Bias (NMB) of NO<sub>2</sub> VCD between the baseline simulation and**  
 202 **GEMS DOAS (a) and GEMS DVCF (b). Normalized Root Mean Square Error (NRMSE) of**  
 203 **NO<sub>2</sub> VCD between the baseline simulation and GEMS DOAS (c) and GEMS DVCF (d).**

204  
 205  
 206  
 207  
 208  
 209  
 210  
 211  
 212  
 213

### 214 **S3 Uncertainty in GEMS DOAS due to ASIA-AQv3 Emission Inventory**

215

216 According to the GEMS DOAS team (private communication), the operational GEMS version 3  
217 uses the ASIA-AQv3 anthropogenic emissions inventory as input for its prior GEOS-Chem  
218 model. This prior is used to derive key retrieval parameters, including air mass factors, shape  
219 factors, and averaging kernels. In our study period (September 2023), biomass burning in  
220 Thailand is minimal (late wet season), so anthropogenic emissions are the dominant source of  
221 NO<sub>2</sub>. Consequently, the ASIA-AQv3 inventory can exert a significant influence on the retrieved  
222 GEMS NO<sub>2</sub> VCDs over Thailand during this time.

223

224 We discovered that the ASIA-AQv3 inventory contains an anomalously high NO<sub>x</sub> point source in  
225 Lampang. The magnitude of this single source in ASIA-AQv3 is significantly larger than the NO<sub>x</sub>  
226 emissions allocated to known major sources like the Mae Moh power plant or even the Bangkok  
227 Metropolitan Region, within the same inventory. This large Lampang emission does not appear  
228 in the CAMS or the HTAP global inventories (Fig. S6), and there are no known large power  
229 plants or industrial facilities in Lampang city that would justify such a high emission. Notably, the  
230 total NO<sub>x</sub> emissions for Thailand in ASIA-AQv3 are of the same order as those in CAMS and  
231 HTAP, implying that the Lampang point source significantly contributes to total NO<sub>x</sub> emissions  
232 in Thailand. In other inventories, by contrast, the Bangkok Metropolitan Region and the Mae  
233 Moh power plant are the main NO<sub>x</sub> contributors. This suggests that ASIA-AQv3's Lampang  
234 point source might be too high for NO<sub>x</sub> emissions in Thailand.

235

236 Our inversion results indicate that ASIA-AQv3 indirectly affects the top-down emission  
237 estimates. The IFDMB posterior NO<sub>x</sub> emissions for North Thailand appear to be influenced by  
238 the Lampang point source (Fig. S7). Because our WRF-Chem model and GEMS data are  
239 aggregated onto a coarse grid (~81 × 81 km<sup>2</sup>), any extreme point source signal in the GEMS  
240 observations tends to be spatially spread out over the surrounding area. As a result, the  
241 influence of the Lampang point source can be seen in the posterior emission field over a broad  
242 area of North Thailand. However, since we did not use ASIA-AQv3 directly to adjust the  
243 emissions, the posterior emissions do not simply replicate the ASIA-AQv3 spatial pattern.

244

245 Furthermore, the GEMS retrieval reported high RMSE for NO<sub>2</sub> VCDs in the area around this  
246 Lampang point source. In future applications of GEMS data, we recommend filtering the satellite  
247 data not only by the standard quality flags but also by excluding data points with abnormally  
248 high errors. This is because the RMSE (order of 10<sup>13</sup>) in GEMS version 3 is relatively low  
249 compared to the NO<sub>2</sub> VCDs (order of 10<sup>15</sup>). Consequently, the weighting by  $\sigma$  in the cost  
250 function is insufficient to handle this uncertainty. Applying such an error filter would help remove  
251 spurious signals and improve the robustness of emission updates derived from GEMS satellite  
252 observations.

253

254

255

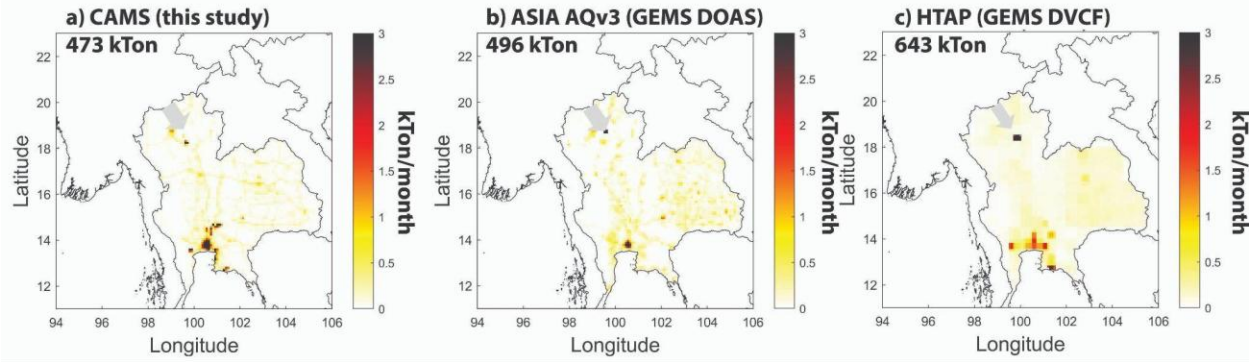

256  
257  
258  
259  
260  
261  
262

**Figure S6: The comparison of NO<sub>x</sub> emissions during September 2023 from three different inventories: a) CAMS, b) ASIA AQv3, and c) HTAP. The arrow points to the high NO<sub>2</sub> VCDs in GEMS DOAS.**

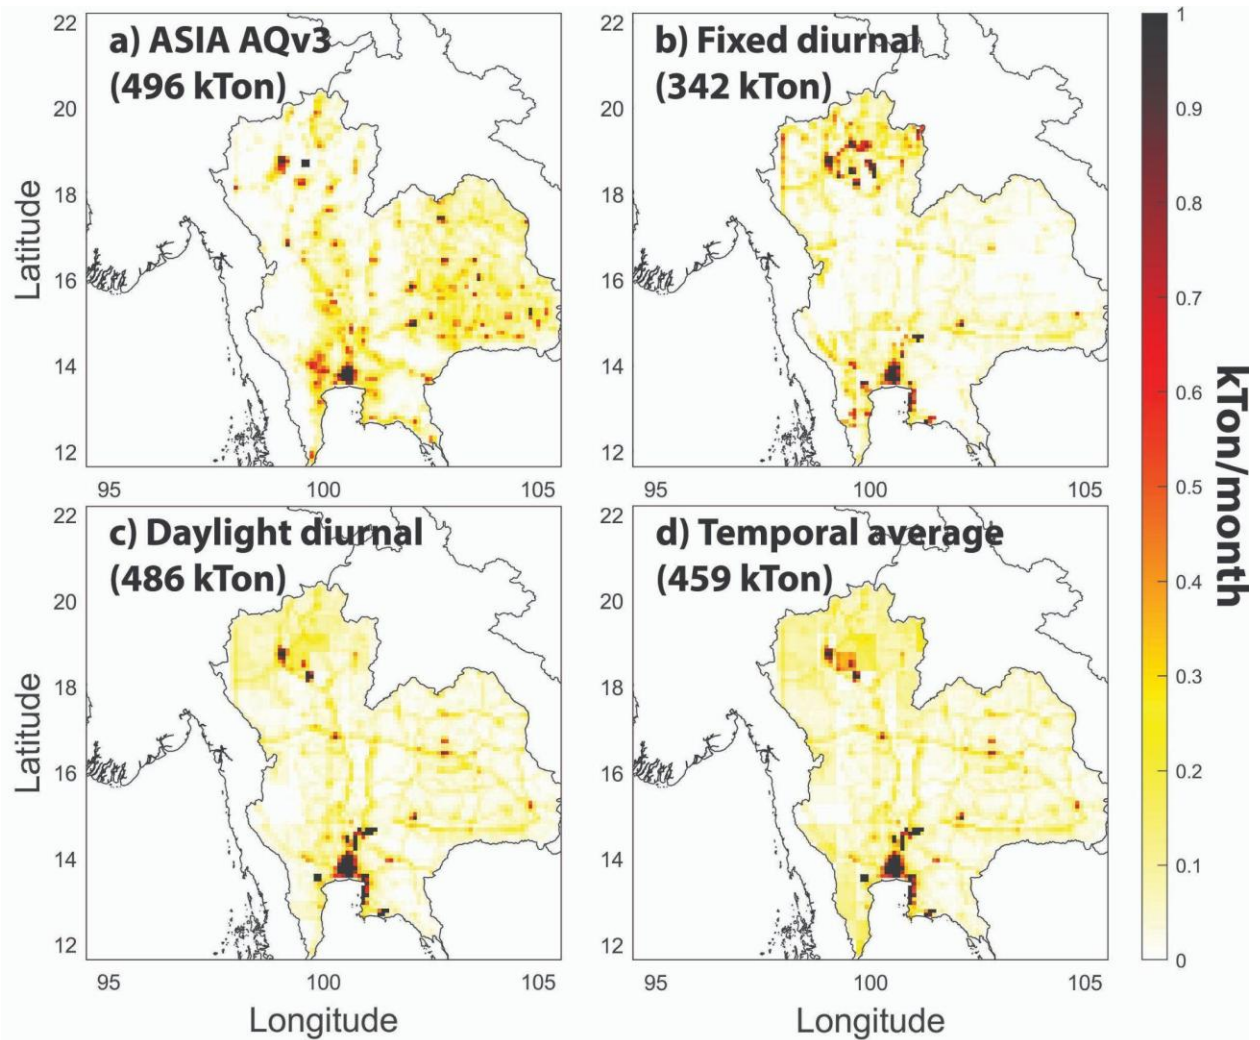

263  
264  
265

**Figure S7: The comparison of NO<sub>x</sub> emissions between ASIA AQv3 and our posterior emissions in September 2023.**

266  
267  
268  
269  
270  
271  
272  
273  
274  
275  
276  
277  
278  
279  
280  
281  
282  
283  
284  
285  
286  
287  
288  
289  
290  
291  
292  
293  
294  
295  
296  
297  
298  
299  
300  
301  
302  
303  
304  
305  
306  
307  
308  
309

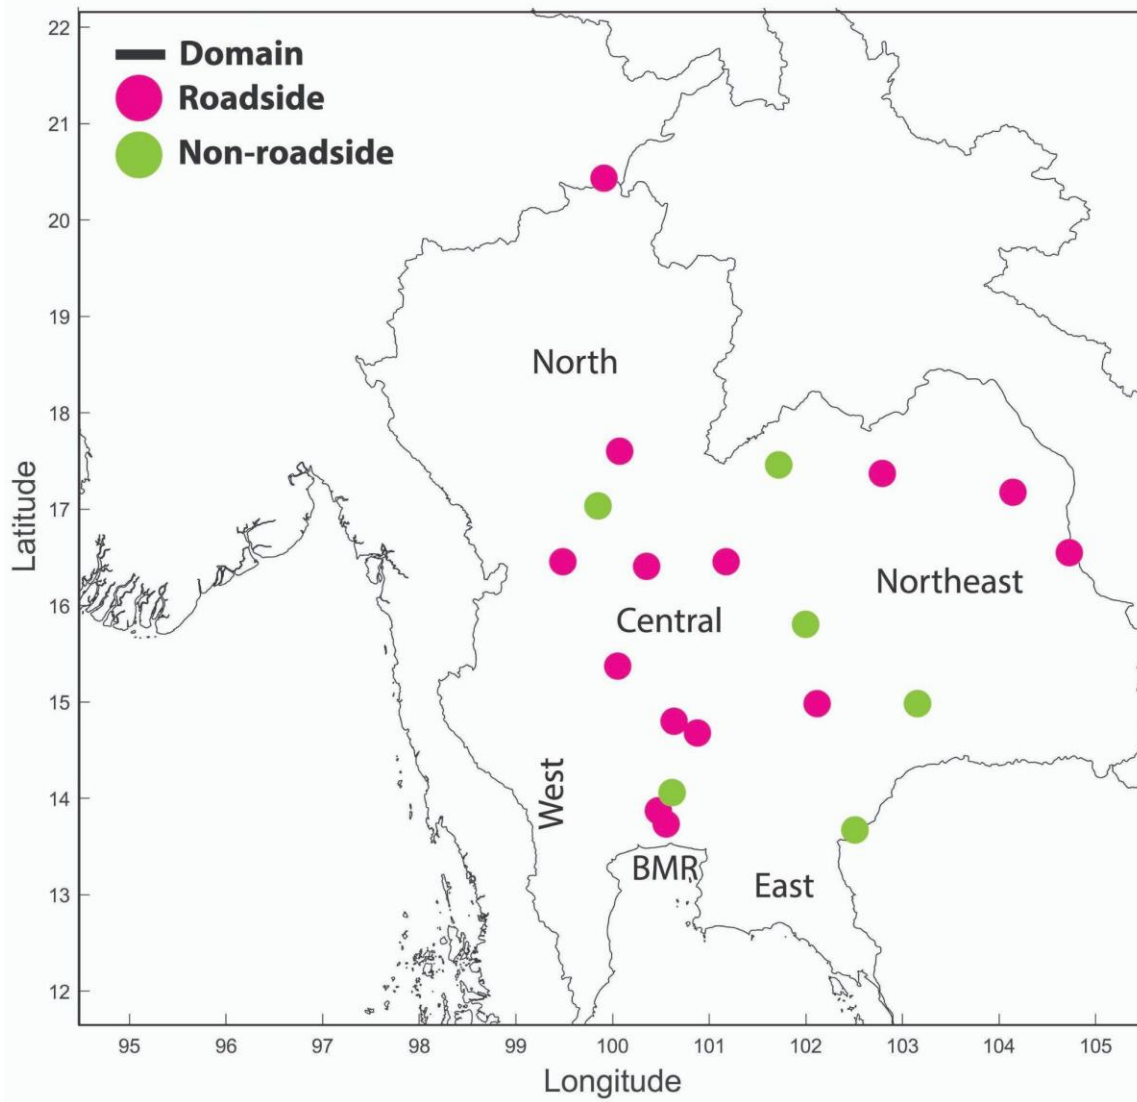

311  
312 **Figure S8: Model domain and location of PCD stations, classified as roadside (pink) and**  
313 **non-roadside (green). BMR is the Bangkok Metropolitan Region.**

314  
315  
316

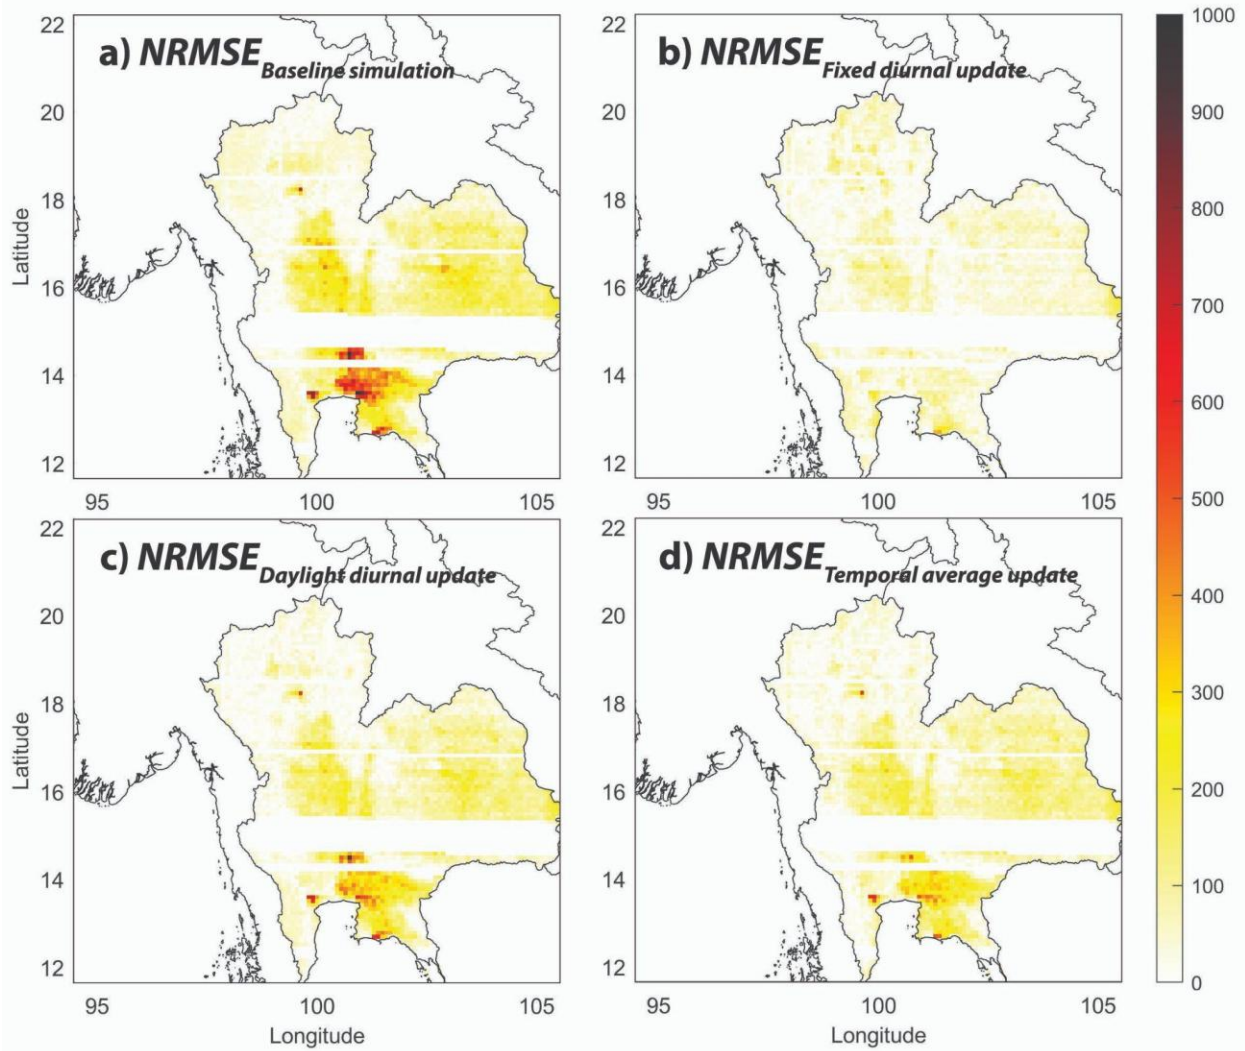

317  
 318 **Figure S9: Normalized Root Mean Square (NRMSE) of NO<sub>2</sub> VCD between WRF-Chem and**  
 319 **GEMS of IFDMB for September 2023 using (a) prior emissions, and emissions updated by**  
 320 **(b) fixed diurnal, (c) daylight diurnal, and (d) temporal average update schemes.**  
 321

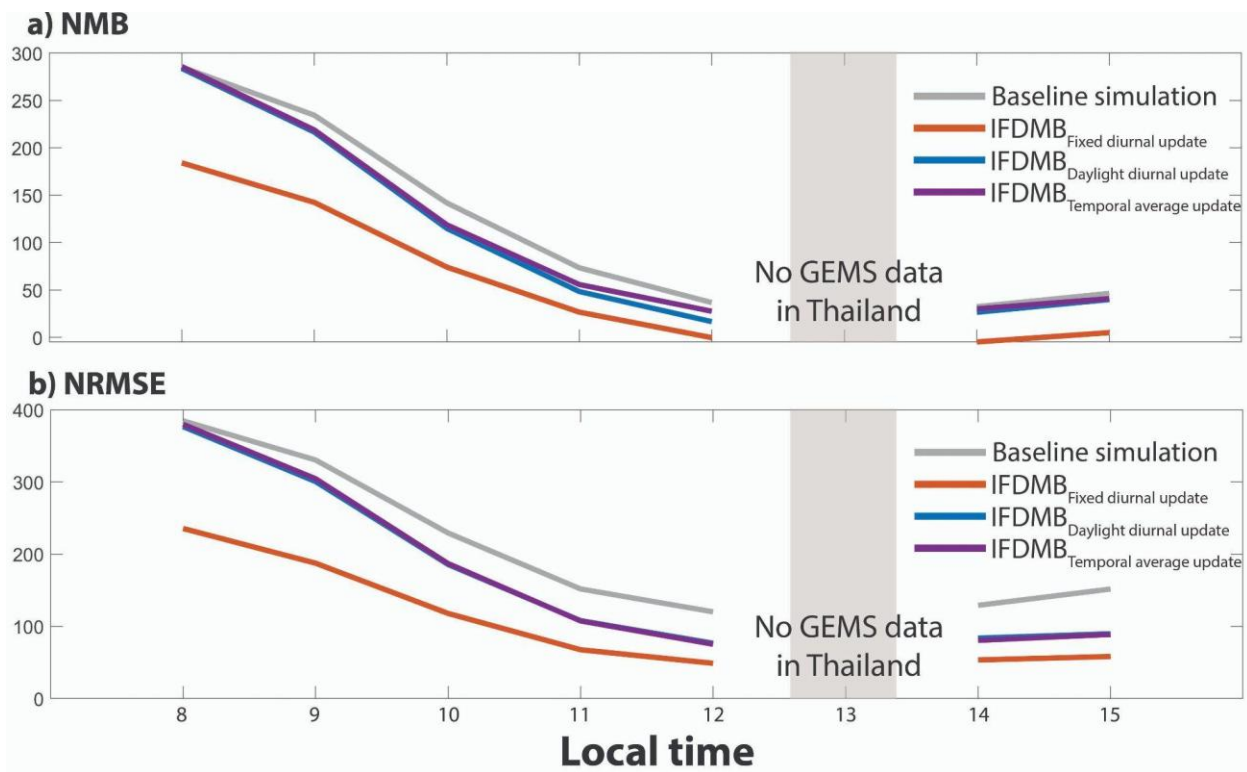

322  
323  
324

**Figure S10: Monthly statistical evaluation between WRF-Chem and GEMS NO<sub>2</sub> VCD of each hour averaged from Thailand grid cells.**

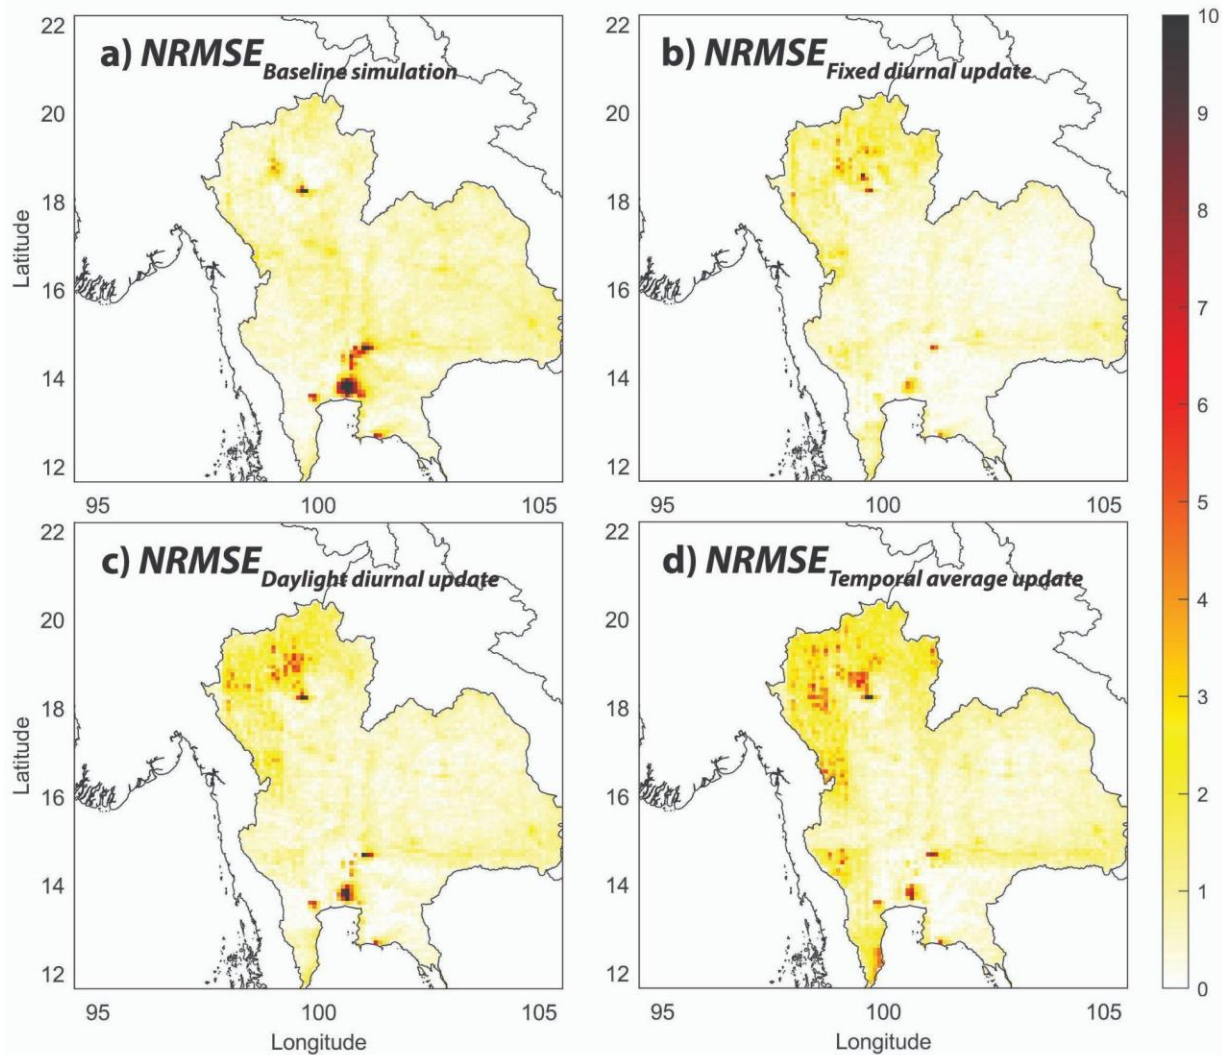

325  
 326 **Figure S11: NRMSE of NO<sub>2</sub> VCD between WRF-Chem and GEMS of IFDDB for September**  
 327 **2023 using (a) prior emissions, and emissions updated by (b) fixed diurnal, (c) daylight**  
 328 **diurnal, and (d) temporal average update schemes.**

329  
 330  
 331

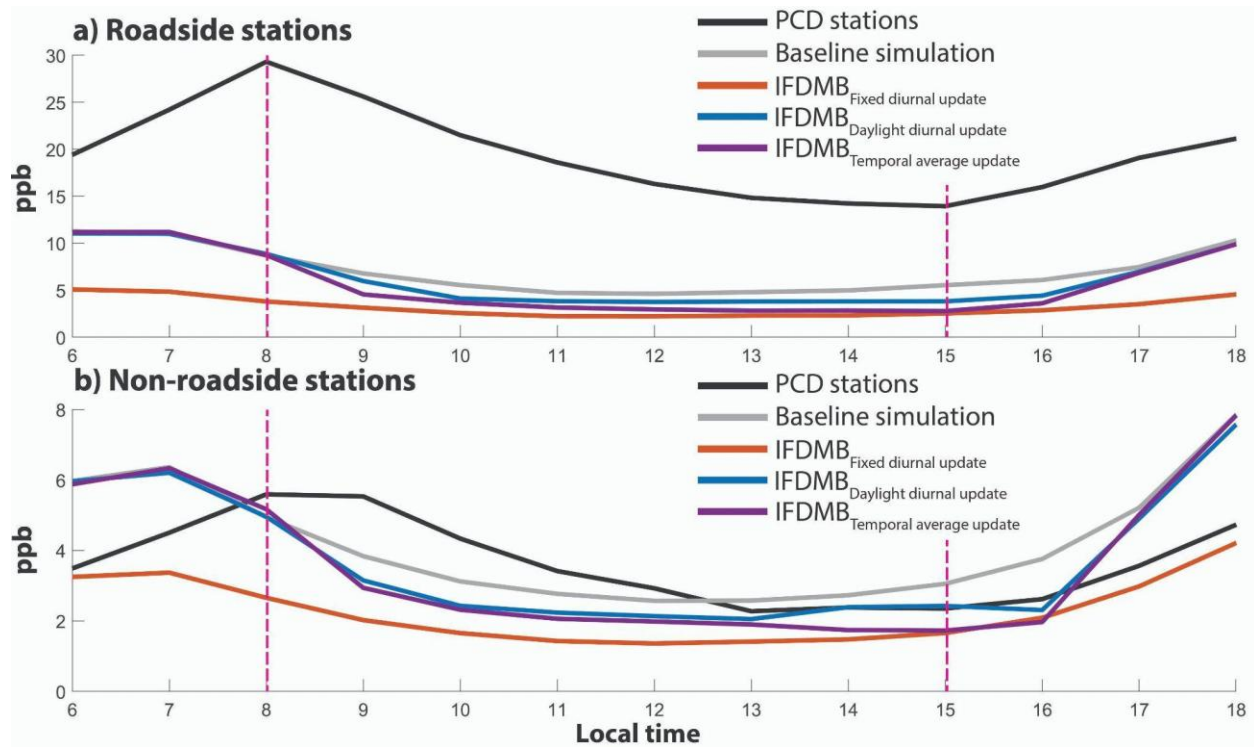

332  
 333  
 334  
 335  
 336  
 337  
 338  
 339  
 340  
 341  
 342  
 343  
 344  
 345  
 346  
 347  
 348  
 349  
 350  
 351  
 352  
 353  
 354  
 355  
 356  
 357

**Figure S12: The monthly average diurnal profile of surface NO<sub>x</sub> mixing ratios from PCD stations (black) and WRF-Chem: the baseline simulation (gray), IFDMB with fixed diurnal update (orange), IFDMB with daylight diurnal update (blue), and IFDMB with temporal average update (purple). PCD stations are classified into roadside stations (a) and non-roadside stations (b). The pink lines mark the GEMS overpass times in Thailand from 08:00 - 15:00 local time.**

358  
359  
360  
361  
362  
363

**Supplement table**

**Table S2: Monthly statistical evaluation between TROPOMI NO<sub>2</sub> VCD and WRF-Chem for IFDMB with different update schemes for Thailand and BMR.**

| <b>Thailand</b>                   | <b>NMB (unitless)</b> | <b>NRMSE (unitless)</b> | <b>R</b> |
|-----------------------------------|-----------------------|-------------------------|----------|
| Baseline simulation               | 0.80                  | 1.21                    | 0.79     |
| IFDMB <sub>Fixed diurnal</sub>    | 0.60                  | 0.86                    | 0.61     |
| IFDMB <sub>Daylight diurnal</sub> | 0.84                  | 1.19                    | 0.63     |
| IFDMB <sub>Temporal average</sub> | 1.05                  | 1.41                    | 0.47     |

  

| <b>BMR</b>                        | <b>NMB (unitless)</b> | <b>NRMSE (unitless)</b> | <b>R</b> |
|-----------------------------------|-----------------------|-------------------------|----------|
| Baseline simulation               | 3.46                  | 5.26                    | 0.90     |
| IFDMB <sub>Fixed diurnal</sub>    | 0.59                  | 1.25                    | 0.93     |
| IFDMB <sub>Daylight diurnal</sub> | 1.58                  | 3.22                    | 0.88     |
| IFDMB <sub>Temporal average</sub> | 0.66                  | 2.05                    | 0.82     |

364  
365  
366  
367  
368  
369  
370  
371  
372  
373  
374  
375  
376  
377  
378  
379  
380  
381  
382  
383  
384  
385

386 **References**

387

388 Huang, X., Yang, K., Kondragunta, S., Wei, Z., Valin, L., Szykman, J., and Goldberg, M.: NO<sub>2</sub>  
389 retrievals from NOAA-20 OMPS: Algorithm, evaluation, and observations of drastic changes  
390 during COVID-19, *Atmos. Environ.*, 290, 119367,  
391 <https://doi.org/10.1016/j.atmosenv.2022.119367>, 2022.

392 Yang, K., Carn, S. A., Ge, C., Wang, J., and Dickerson, R. R.: Advancing measurements of  
393 tropospheric NO<sub>2</sub> from space: New algorithm and first global results from OMPS, *Geophys. Res.*  
394 *Let.*, 41, 4777–4786, <https://doi.org/10.1002/2014GL060136>, 2014.

395 Yang, K., Kondragunta, S., and Wei, Z.: The NO<sub>2</sub> Algorithm for GeoXO-ACX and Application to  
396 GEMS and TEMPO, <https://doi.org/10.22541/essoar.170365312.22362491/v1>, 2023.

397

398
